# Supplementary material for: Effects of short-term, sublethal fipronil and its metabolite on dragonfly feeding activity
Source: PubMed Central journal article supplement (PMC6040742; doi:10.1371/journal.pone.0200299), 2018-07-11
Supplement: pone.0200299.s003.pdf [file pone.0200299.s003.pdf]

**S1 Table. Comparison of nominal and actual imidacloprid, fipronil and fipronil sulfone levels at the start of trials.** Data are presented as mean  $\pm$  standard deviation (SD).

| Imidacoprid                     |                               |      | Fipronil                        |                               |      | Fipronil-sulfone                |                               |      |
|---------------------------------|-------------------------------|------|---------------------------------|-------------------------------|------|---------------------------------|-------------------------------|------|
| Norminal<br>( $\mu\text{g/L}$ ) | Actual<br>( $\mu\text{g/L}$ ) | SD   | Norminal<br>( $\mu\text{g/L}$ ) | Actual<br>( $\mu\text{g/L}$ ) | SD   | Norminal<br>( $\mu\text{g/L}$ ) | Actual<br>( $\mu\text{g/L}$ ) | SD   |
| 0.01                            | 0.02                          | 0    | 0.01                            | NA                            |      | 0.01                            | NA                            |      |
| 0.1                             | 0.1                           | 0.01 | 0.1                             | 0.1                           | 0.01 | 0.1                             | 0.1                           | 0.01 |
| 1                               | 1.02                          | 0.01 | 1                               | 1.03                          | 0.03 | 1                               | 1.03                          | 0.01 |
| 10                              | 9.96                          | 0.08 | 10                              | 9.85                          | 0.07 | 10                              | 9.75                          | 0.07 |
| 100                             | 98.8                          | 0.40 | 100                             | 98.5                          | 0.70 | 100                             | 97.8                          | 0.35 |
| 1000                            | 992.8                         | 3.10 | 1000                            | 992.5                         | 3.50 | 1000                            | 994.3                         | 6.00 |

NA = not applicable.
