# Supplementary material for: Effects of short-term, sublethal fipronil and its metabolite on dragonfly feeding activity
Source: PubMed Central journal article supplement (PMC6040742; doi:10.1371/journal.pone.0200299), 2018-07-11
Supplement: pone.0200299.s004.pdf [file pone.0200299.s004.pdf]

**S2 Table. *t*-value, degrees of freedom and *p*-value in Fig 2.**

| Treatment<br>( $\mu\text{g/L}$ ) | Imidaloiprid    |           |                 | Fipronil        |           |                 | Fipronil-sulfone |           |                 |
|----------------------------------|-----------------|-----------|-----------------|-----------------|-----------|-----------------|------------------|-----------|-----------------|
|                                  | <i>t</i> -value | <i>df</i> | <i>p</i> -value | <i>t</i> -value | <i>df</i> | <i>p</i> -value | <i>t</i> -value  | <i>df</i> | <i>p</i> -value |
| 0.01                             |                 | n.s.      |                 |                 | n.s.      |                 | 3.743            | 6         | < 0.001         |
| 0.1                              |                 | n.s.      |                 |                 | n.s.      |                 | 3.743            | 6         | 0.0014          |
| 1                                |                 | n.s.      |                 |                 | n.s.      |                 | 4.679            | 6         | < 0.001         |
| 10                               |                 | n.s.      |                 | 2.615           | 6         | 0.047           | 17.077           | 6         | < 0.001         |
| 100                              |                 | n.s.      |                 | 17.236          | 6         | < 0.001         | 17.779           | 6         | < 0.001         |
| 1000                             | 6.026           | 6         | < 0.001         | 18.817          | 6         | < 0.001         | 17.779           | 6         | < 0.001         |
