# Supplementary material for: Effects of short-term, sublethal fipronil and its metabolite on dragonfly feeding activity
Source: PubMed Central journal article supplement (PMC6040742; doi:10.1371/journal.pone.0200299), 2018-07-11
Supplement: pone.0200299.s007.pdf [file pone.0200299.s007.pdf]

**S5 Table. *t*-value, degrees of freedom and *p*-value in Fig 5.**

| Treatment<br>( $\mu\text{g/L}$ ) | Fipronil        |           |                 | Fipronil-sulfone |           |                 |
|----------------------------------|-----------------|-----------|-----------------|------------------|-----------|-----------------|
|                                  | <i>t</i> -value | <i>df</i> | <i>p</i> -value | <i>t</i> -value  | <i>df</i> | <i>p</i> -value |
| 0.01                             |                 | n.s.      |                 |                  | n.s.      |                 |
| 0.1                              |                 | n.s.      |                 |                  | n.s.      |                 |
| 1                                |                 | n.s.      |                 | 4.1369           | 3         | 0.015           |
| 10                               | 11.952          | 3         | 0.0012          | 11.217           | 3         | 0.0015          |
| 100                              | 6.58            | 3         | < 0.01          | 20.333           | 3         | < 0.001         |
| 1000                             | 16.743          | 3         | < 0.001         | 5.992            | 3         | 0.009           |
