# Supplementary material for: Effects of short-term, sublethal fipronil and its metabolite on dragonfly feeding activity
Source: PubMed Central journal article supplement (PMC6040742; doi:10.1371/journal.pone.0200299), 2018-07-11
Supplement: pone.0200299.s008.pdf [file pone.0200299.s008.pdf]

**S6 Table. *t*-value, degrees of freedom and *p*-value in table 2.**

|                      | Treatment<br>( $\mu\text{g/L}$ ) | Imidaloiprid    |           |                 | Fipronil        |           |                 | Fipronil-sulfone |           |                 |
|----------------------|----------------------------------|-----------------|-----------|-----------------|-----------------|-----------|-----------------|------------------|-----------|-----------------|
|                      |                                  | <i>t</i> -value | <i>df</i> | <i>p</i> -value | <i>t</i> -value | <i>df</i> | <i>p</i> -value | <i>t</i> -value  | <i>df</i> | <i>p</i> -value |
| <i>S. infuscatum</i> | 0.01                             |                 | n.s.      |                 |                 | n.s.      |                 |                  | n.s.      |                 |
|                      | 0.1                              |                 | n.s.      |                 |                 | n.s.      |                 |                  | n.s.      |                 |
|                      | 1                                |                 | n.s.      |                 |                 | n.s.      |                 | 3.013            | 4         | < 0.01          |
|                      | 10                               |                 | n.s.      |                 | 3.013           | 4         | < 0.05          |                  |           |                 |
|                      | 100                              |                 | n.s.      |                 |                 |           |                 |                  |           |                 |
|                      | 1000                             | 4.641           | 3         | < 0.001         |                 |           |                 |                  |           |                 |
| <i>S. frequens</i>   | 0.01                             |                 | n.s.      |                 |                 | n.s.      |                 |                  | n.s.      |                 |
|                      | 0.1                              |                 | n.s.      |                 |                 | n.s.      |                 |                  | n.s.      |                 |
|                      | 1                                |                 | n.s.      |                 |                 | n.s.      |                 |                  | n.s.      |                 |
|                      | 10                               |                 | n.s.      |                 | 3.678           | 6         | < 0.001         |                  |           |                 |
|                      | 100                              | 2.579           | 6         | < 0.05          |                 |           |                 |                  |           |                 |
|                      | 1000                             | 3.696           | 6         | < 0.001         |                 |           |                 |                  |           |                 |
